# Supplementary material for: From a mononuclear FeIIL2 complex to a spin crossover FeII4L6 cage by symmetric ligand architecture modification: insights into the ammonia gas sensing mechanism
Source: Royal Society of Chemistry journal article supplement (doi:10.1039/d3tc02231e), 2023-01-01
Supplement: d3tc02231e1.pdf [file d3tc02231e1.pdf]

# **From a mononuclear $\text{Fe}^{\text{II}}\text{L}_2$ complex to a spin crossover $\text{Fe}^{\text{II}}_4\text{L}_6$ cage by symmetric ligand architecture modification: insights into the ammonia gas sensing mechanism**

**Weiyang Li,<sup>a</sup> Aurelian Rotaru,<sup>b</sup> Mariusz Wolff,<sup>c</sup> Serhiy Demeshko,<sup>d</sup> Franc Meyer,<sup>d</sup> Yann Garcia<sup>\*a</sup>**

<sup>a</sup> Institute of Condensed Matter and Nanosciences, Molecules, Solids, Reactivity (IMCN/MOST), Université catholique de Louvain, Place Louis Pasteur 1, 1348 Louvain-la-Neuve, Belgium

<sup>b</sup> Department of Electrical Engineering and Computer Science and MANSiD Research Center, “Stefan cel Mare” University, University Street, 13, Suceava 720229, Romania

<sup>c</sup> Institut für Chemische Katalyse, Universität Wien, Währinger Strasse 38, 1090 Wien, Austria

<sup>d</sup> Institut für Anorganische Chemie, Universität Göttingen, Tammannstrasse 4, D-37077 Göttingen, Germany

## Contents

|                                                                                                                                                                                      |         |
|--------------------------------------------------------------------------------------------------------------------------------------------------------------------------------------|---------|
| General information-----                                                                                                                                                             | S3      |
| Synthesis of <i>N</i> -amino-1,8-naphthalimide and the corresponding <sup>1</sup> H and <sup>13</sup> C NMR spectra -----                                                            | S4      |
| Synthesis of <b>1</b> -----                                                                                                                                                          | S5      |
| Synthesis of amorphous <b>2</b> -----                                                                                                                                                | S6      |
| Single-crystal X-ray diffraction analyses-----                                                                                                                                       | S7      |
| Table S1 Crystallographic parameters for <b>1</b> -----                                                                                                                              | S8      |
| Table S2 Fe–N bond lengths for <b>1</b> -----                                                                                                                                        | S8      |
| Fig. S1 Plots of $\chi_m T$ vs $T$ for <b>1</b> -----                                                                                                                                | S9      |
| Fig. S2 FT-IR for <b>1</b> -----                                                                                                                                                     | S9      |
| Fig. S3 SEM image (a) and EDS spectrum (b) for <b>1</b> -----                                                                                                                        | S9      |
| Fig. S4 Diagram of home-made sensor device-----                                                                                                                                      | S10     |
| Fig. S5 (a) Digital photographs and (b) corresponding Euclidean distances and of <b>1</b> after exposure to different analytes -----                                                 | S10     |
| Fig. S6 Diffuse reflectance spectral of <b>1</b> and <b>1</b> @H <sub>2</sub> O -----                                                                                                | S10     |
| Fig. S7 Plots of $\chi_m T$ vs $T$ for <b>1</b> @NH <sub>3</sub> -----                                                                                                               | S11     |
| Fig. S8 Diffuse reflectance spectrum of regenerated <b>1</b> -----                                                                                                                   | S11     |
| Fig. S9a-S9g ESI-TOF-MS of <b>2</b> and the comparison of the observed isotopic patterns with the simulated spectra-----                                                             | S11-S12 |
| Fig. S10 FT-IR for <b>2</b> -----                                                                                                                                                    | S12     |
| Fig. S11 <sup>57</sup> Fe Mössbauer spectrum of <b>2</b> recorded at 7 K-----                                                                                                        | S13     |
| Fig. S12 (a) Digital photographs and (b) corresponding Euclidean distances and of <b>2</b> after exposure to different analytes -----                                                | S13     |
| Fig. S13 Diffuse reflectance spectrum and digital images of <b>2</b> and <b>2</b> @H <sub>2</sub> O-----                                                                             | S13     |
| Fig. S14 Nitrogen adsorption-desorption isotherms of <b>2</b> -----                                                                                                                  | S14     |
| Fig. S15 Nitrogen adsorption-desorption isotherms of <b>1</b> -----                                                                                                                  | S14     |
| Fig. S16 Crystal structure of cage <b>2</b> -----                                                                                                                                    | S14     |
| Fig. S17 Diffuse reflectance spectrum of regenerated <b>2</b> -----                                                                                                                  | S15     |
| Fig. S18 FT-IR spectral of <b>2</b> @NH <sub>3</sub> and regenerated <b>2</b> -----                                                                                                  | S15     |
| Fig. S19 The subcomponents ligand structures of the reported cage (SL0), <b>1</b> (SL1) and <b>2</b> (SL2) and the corresponding colour changes after exposure to ammonia vapor----- | S15     |
| Table S3 Response time database of <b>1</b> for NH <sub>3</sub> -----                                                                                                                | S16     |
| Table S4 Colour vectors for the response of <b>1</b> to different analytes-----                                                                                                      | S16-17  |
| Table S5 <sup>57</sup> Fe Mössbauer parameters of <b>1</b> , <b>1</b> @NH <sub>3</sub> and the regenerated <b>1</b> -----                                                            | S17     |
| Table S6 <sup>57</sup> Fe Mössbauer parameters of <b>2</b> recorded at 80 K and 7 K -----                                                                                            | S17     |
| Table S7 Colour vectors for the response of <b>2</b> to different analytes-----                                                                                                      | S17-18  |
| Table S8 Response time database of <b>2</b> for NH <sub>3</sub> -----                                                                                                                | S18     |
| Table S9 <sup>57</sup> Fe Mössbauer parameters of <b>2</b> , <b>2</b> @NH <sub>3</sub> and the regenerated <b>2</b> -----                                                            | S19     |
| References-----                                                                                                                                                                      | S19     |

## General information

All the chemicals and solvents were commercially available and were used without further purification.  $^1\text{H}$  NMR and  $^{13}\text{C}$  NMR spectra were recorded on a Bruker AVANCE 300MHz spectrometer. Electrospray ionization time-of-flight mass spectrometry (ESI-TOF-MS) were collected on a Bruker maXis UHR ESI-Qq-TOF mass spectrometer in the positive ion mode. Elemental analysis (C, H, and N) was measured by MEDAC Ltd, UK. Powder X-ray diffraction (XRD) measurements were carried out at room temperature on a Bruker D8 ADVANCE X-ray diffractometer with Cu  $K\alpha$  radiation ( $\lambda = 1.5148 \text{ \AA}$ ). Fourier transformed infrared (FT-IR) spectra were performed on Equinox 55 (Bruker) equipped with an ATR modulus and an MCT detector. The micromorphology was studied by field emission scanning electron microscopy (SEM) using a Mira3-TESCAN microscope from Oxford Instruments Inc. Thermogravimetric analyses (TGAs) were carried out by Mettler Toledo TGA/SDTA 851e analyzer in  $\text{N}_{2(g)}$  ( $100 \text{ mL min}^{-1}$ ) at a heating rate of  $10 \text{ }^\circ\text{C min}^{-1}$  between  $25 \text{ }^\circ\text{C}$  and  $850 \text{ }^\circ\text{C}$ . The specific surface area was obtained by analyzing the nitrogen absorption and desorption curves measured on Micromeritics ASAP 2020. Diffuse reflectance spectra (DRS) were performed with a PerkinElmer Lambda 9 UV/vis/NIR spectrophotometer and converted into absorption spectra by using the Kubelka–Munk function, using  $\text{BaSO}_4$  as a reference. Magnetic susceptibility was measured on a Quantum design MPMS-5S (for **1**) or MPMS3 (for **2**) SQUID magnetometers and the magnetic data were corrected for the sample holder and diamagnetic contributions.  $^{57}\text{Fe}$  Mössbauer spectra for **1**, **1**@ $\text{NH}_3$ , regenerated **1**, **2**@ $\text{NH}_3$  and regenerated **2** were recorded at  $298 \text{ K}$  using a constant acceleration Wissel Mössbauer spectrometer operated in the transmission mode and equipped with a Reuter Stokes proportional counter.  $^{57}\text{Fe}$  Mössbauer spectra for **2** at low temperatures ( $7 \text{ K}$  and  $80 \text{ K}$ ) were recorded using an alternating constant acceleration Wissel Mössbauer spectrometer operated in the transmission mode and equipped with a Janis closed-cycle helium cryostat. The Mössbauer spectrum of **2** at  $295 \text{ K}$  was recorded using an alternating constant acceleration Wissel Mössbauer spectrometer operated in the transmission mode and equipped with an OptiCool closed-cycle helium cryostat from Quantum Design. All spectra were fitted by the Recoil 1.05 Mössbauer Analysis software, except **2** (fitted with the Mfit program (E. Bill, Max-Planck Institute for Chemical Energy Conversion, Mülheim/Ruhr, Germany)). A home-made device was used for the sensing experiments (Fig. S4). The experiments were performed in triplicate at room temperature ( $25 \pm 1 \text{ }^\circ\text{C}$ ).

## Experimental Section

### Synthesis of *N*-amino-1,8-naphthalimide

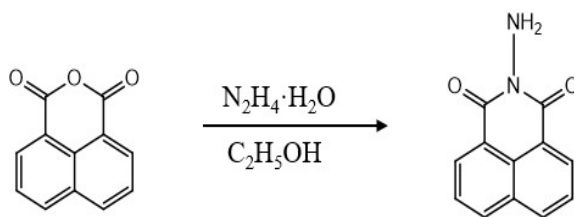

**Scheme:** synthesis method of *N*-amino-1,8-naphthalimide.

*N*-amino-1,8-naphthalimide was synthesized via a condensation reaction between 1,8-naphthalic anhydride (10 mmol, 1.98 g) and hydrazine hydrate (10 mmol, 0.5 g) in 50 ml methanol. A light-yellow colour solid was separated out after 8 h. The precipitate was filtered out and recrystallized in methanol. Yield: 1.8 g, 85%.  $^1\text{H}$  NMR (DMSO- $d_6$ , 300 MHz, ppm)  $\delta$ : 8.47 (m, 4H), 7.86 (t, 2H), 5.78 (s, 2H);  $^{13}\text{C}$  NMR (75 MHz, DMSO- $d_6$ )  $\delta$ : 160.58, 134.64, 131.33, 127.33, 126.05, 121.78. ESI-MS ( $m/z$ ): calcd. for  $\text{C}_{12}\text{H}_8\text{N}_2\text{O}_2$ , 213.0658; found, 213.0658. Melting point:  $> 260$  °C.

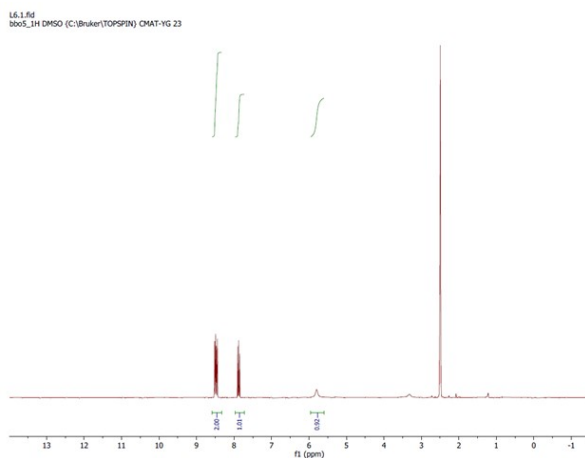

$^1\text{H}$  NMR spectrum for *N*-amino-1,8-naphthalimide.

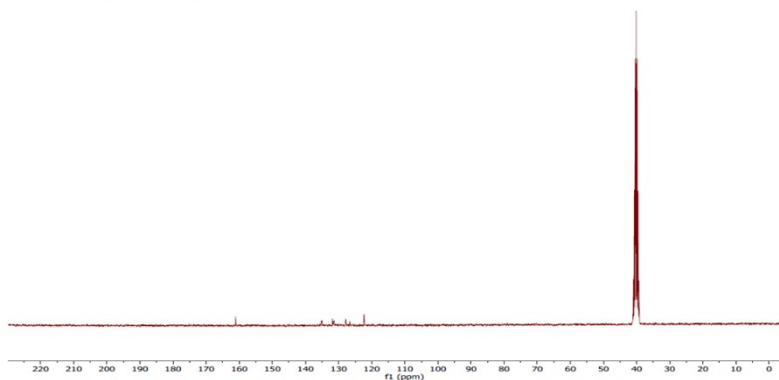

$^{13}\text{C}$  NMR spectrum for *N*-amino-1,8-naphthalimide.

## Synthesis of **1**

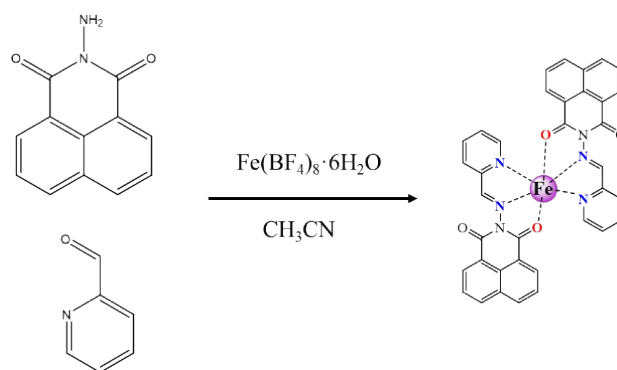

**Scheme:** Synthesis method of **1**.

*N*-amino-1,8-naphthalimide (42.4 mg, 0.2 mmol), 2-formylpyridine (19.1  $\mu\text{L}$ , 0.2 mmol) and  $\text{Fe}(\text{BF}_4)_2 \cdot 6\text{H}_2\text{O}$  (33.7 mg, 0.1 mmol) were added to Schlenk flask with acetonitrile (30 mL). The reaction mixture was stirred under  $\text{Ar}_{(\text{g})}$  at 50  $^\circ\text{C}$  overnight and then cooled to room temperature. The resulting purple solution was filtered and vapor-diffused with diethyl ether. After two weeks, purple crystals suitable for single-crystal X-ray diffraction analyses were obtained. Yield: 10.8 mg, 33% (based on the Fe(II) salt). Elemental analysis calcd. for  $[\text{C}_{36}\text{H}_{22}\text{O}_4\text{N}_6\text{Fe}](\text{BF}_4)_2$ , C 51.97%, H 2.66%, N 10.1%; found: C 52.16%, H 2.95%, N 10.09%. ESI-MS ( $m/z$ ): calcd. for  $[\text{C}_{36}\text{H}_{22}\text{O}_4\text{N}_6\text{Fe}](\text{BF}_4)_2$ , 328.0543; found, 328.0541.

## Synthesis of amorphous **2**

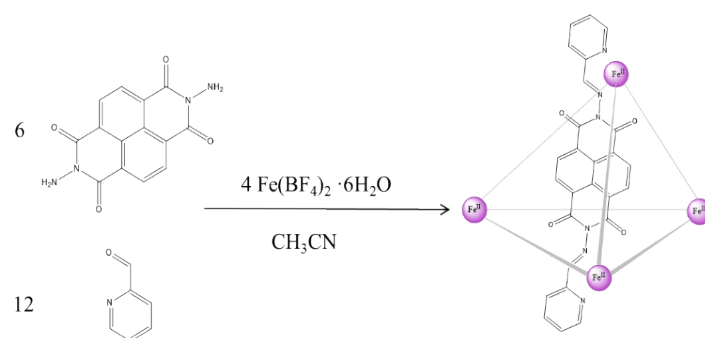

**Scheme:** Formation of **2** through subcomponent self-assembly.

The synthesis of subcomponent ligand *N,N*-diaminonaphthalene-1,4,5,8-tetracarboxydi-imide was prepared according to the literature procedure.<sup>1</sup> Fe(BF<sub>4</sub>)<sub>2</sub> · 6H<sub>2</sub>O (28.1 mg, 0.083 mmol), 2-formylpyridine (23.8 μL, 0.25 mmol) and *N,N*-diaminonaphthalene-1,4,5,8-tetracarboxydi-imide (37 mg, 0.125 mmol) were added to Schlenk flask with acetonitrile (40 mL). The mixture was stirred under argon at 65 °C overnight and then cooled to room temperature. The purple solution obtained was filtered and a large amount of diethyl ether was added to it. The light purple precipitate was filtered and washed five times with an excess of diethyl ether and dried. Yield: 61.6 mg (76%). Elemental analysis calcd. for [C<sub>156</sub>H<sub>84</sub>N<sub>36</sub>O<sub>24</sub>Fe<sub>4</sub>](BF<sub>4</sub>)<sub>8</sub> · 10H<sub>2</sub>O, C 47.50%, H 2.66%, N 12.78%; found C, 47.37%; H, 2.70%; N, 12.58%. ESI-TOF-MS: the following picked signals are those at the high intensities. *m/z* Calcd. for [Fe<sub>4</sub>L<sub>6</sub>(BF<sub>4</sub>)<sub>5</sub>]<sup>3+</sup> 1167.8024, found 1167.8020; Calcd. for [Fe<sub>4</sub>L<sub>6</sub>(BF<sub>4</sub>)<sub>4</sub>]<sup>4+</sup> 854.3508, found 854.3507; Calcd. for [Fe<sub>4</sub>L<sub>6</sub>(BF<sub>4</sub>)<sub>3</sub>]<sup>5+</sup> 666.0798, found 666.0799; Calcd. for [Fe<sub>4</sub>L<sub>6</sub>(BF<sub>4</sub>)<sub>2</sub>]<sup>6+</sup> 540.5658, found 540.5660; Calcd. for [Fe<sub>4</sub>L<sub>6</sub>(BF<sub>4</sub>)]<sup>7+</sup> 450.9129, found 450.9130; Calcd. for [Fe<sub>4</sub>L<sub>6</sub>]<sup>8+</sup> 383.6732, found 383.6734.

## Single-crystal X-ray diffraction analyses

X-ray diffraction analyses for complex **1** at 120 K and 298 K was carried on MAR345 image plate using Mo-K $\alpha$  radiation ( $\lambda = 0.71073\text{\AA}$ ), generated by an Incoatec I $\mu$ S generator equipped with Montel Mirrors. Data integration and reduction were performed with CrysAlis<sup>PRO</sup> (CrysAlis<sup>PRO</sup> Software System, Vol. Rigaku Corporation: Oxford, UK, 2015.) and the implemented absorption correction was applied. The structures were solved by SHELXT and refined by full-matrix least squares on F<sup>2</sup> using SHELXL2018/3. The location of the Fe atom was easily determined, and O, N and C atoms were subsequently located in the Fourier difference maps. Final crystallographic data and refinement values for **1** at 120 K and 298 K are listed in Tables S1. CCDC 2241853 and 2241857 contains the supplementary crystallographic data for this paper.

### ***SHELXT:***

Sheldrick, G. M. (2015). *Acta Cryst. A* **71**, 3-8.

### ***CrysAlis<sup>PRO</sup>:***

Rigaku (2015). *CrysAlisPro Software System*, Version 1.171.38.41. Rigaku Oxford Diffraction

Table S1. Crystal data and structure refinement details for **1** at 120 K and 298 K.

| Temperature                                                            | 120 K                                                                                            | 298 K                                                                                            |
|------------------------------------------------------------------------|--------------------------------------------------------------------------------------------------|--------------------------------------------------------------------------------------------------|
| Formula                                                                | C <sub>36</sub> H <sub>22</sub> FeN <sub>6</sub> O <sub>4</sub> ·(BF <sub>4</sub> ) <sub>2</sub> | C <sub>36</sub> H <sub>22</sub> FeN <sub>6</sub> O <sub>4</sub> ·(BF <sub>4</sub> ) <sub>2</sub> |
| Formula weight                                                         | 832.06                                                                                           | 832.06                                                                                           |
| Radiation (Å)                                                          | MoK <sub>α</sub> (0.71073)                                                                       | MoK <sub>α</sub> (0.71073)                                                                       |
| Crystal system                                                         | Monoclinic                                                                                       | monoclinic                                                                                       |
| Space group                                                            | <i>P</i> 2 <sub>1</sub> / <i>c</i>                                                               | <i>P</i> 2 <sub>1</sub> / <i>c</i>                                                               |
| a (Å)                                                                  | 8.34709(14)                                                                                      | 8.6034(2)                                                                                        |
| b (Å)                                                                  | 15.0978(4)                                                                                       | 15.1618(4)                                                                                       |
| c (Å)                                                                  | 27.3487(5)                                                                                       | 27.2871(6)                                                                                       |
| α (°)                                                                  | 90                                                                                               | 90                                                                                               |
| β (°)                                                                  | 90.9970(15)                                                                                      | 91.621(2)                                                                                        |
| γ (°)                                                                  | 90                                                                                               | 90                                                                                               |
| V (Å <sup>3</sup> )                                                    | 3446.04(12)                                                                                      | 3558.01(15)                                                                                      |
| Z                                                                      | 4                                                                                                | 4                                                                                                |
| ρ <sub>calc</sub> (g·cm <sup>-3</sup> )                                | 1.604                                                                                            | 1.553                                                                                            |
| Absorption coefficient (mm <sup>-1</sup> )                             | 0.533                                                                                            | 0.516                                                                                            |
| θ range (deg)                                                          | 2.8450 to 26.2100                                                                                | 2.8350 to 26.0770                                                                                |
| F(000)                                                                 | 1680                                                                                             | 1680                                                                                             |
| Crystal size (mm)                                                      | 0.3×0.1×0.07                                                                                     | 0.3×0.1×0.07                                                                                     |
| Reflections collected                                                  | 24108                                                                                            | 24904                                                                                            |
| Independent reflections                                                | 6823 [R <sub>(int)</sub> = 0.0270]                                                               | 7063 [R <sub>(int)</sub> = 0.0306]                                                               |
| Data/restraints/parameters                                             | 6823/50/546                                                                                      | 7063/60/546                                                                                      |
| Goodness of fit on F <sup>2</sup>                                      | 1.042                                                                                            | 1.028                                                                                            |
| R <sub>1</sub> <sup>a</sup> , wR <sub>2</sub> <sup>b</sup> (I > 2σ(I)) | 0.0521, 0.1338                                                                                   | 0.0719, 0.1763                                                                                   |
| R <sub>1</sub> <sup>a</sup> , wR <sub>2</sub> <sup>b</sup> (all data)  | 0.0574, 0.1378                                                                                   | 0.0880, 0.1860                                                                                   |

Table S2. Fe–N bond lengths (Å) for complex **1** at 120 K and 298 K.

|             | 120 K     | 298 K     |
|-------------|-----------|-----------|
| Fe(1)-N(2)  | 2.177 (2) | 2.159 (3) |
| Fe(1)-N(9)  | 2.169 (2) | 2.166 (3) |
| Fe(1)-N(32) | 2.149 (2) | 2.156 (3) |
| Fe(1)-N(39) | 2.193 (2) | 2.181 (3) |
| Fe(1)-O(12) | 2.143 (2) | 2.142 (3) |
| Fe(1)-O(42) | 2.087 (2) | 2.089 (3) |



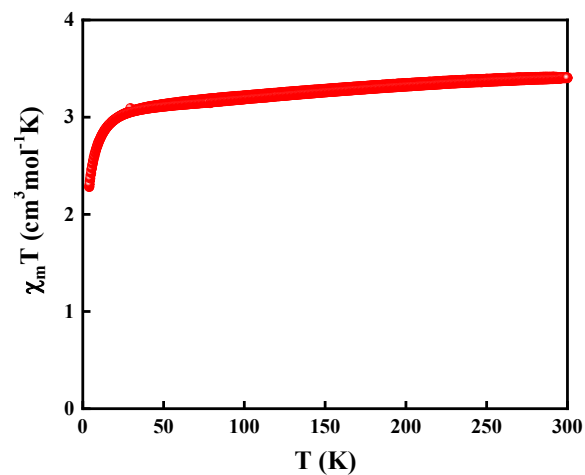

Fig. S1 Temperature-dependent  $\chi_m T$  vs  $T$  plots for **1**.

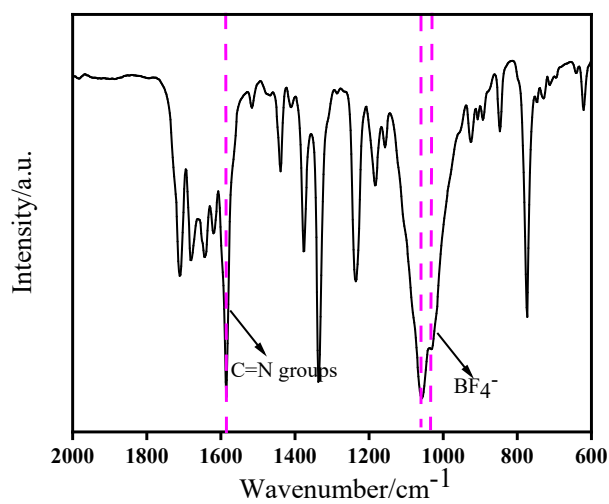

Fig. S2 FT-IR for **1**.

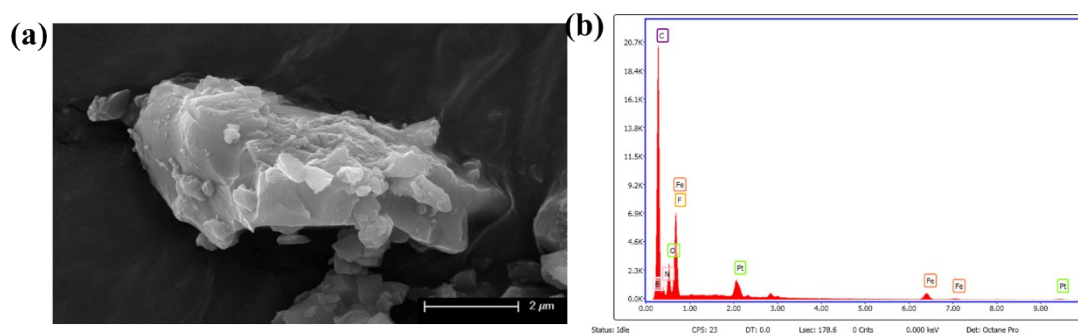

Fig. S3 SEM image (a) and EDS spectrum (b) for **1**. Pt signals are from sample preparation.

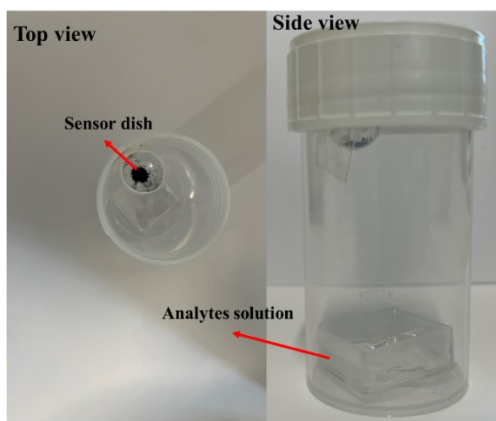

**Fig. S4** Top and side view of the home-made sensor device. The diameter of the bottle is 3.5 cm and the volume is 50 mL. In each experiment, approximately 5 mg of the sensor sample and 0.5 mL of different analyte solutions were added to two separate trays. Colour-changing photos are recorded at specific times by iPhone 13, set to "Photo Mode" "Tap to Focus" and "No Flash".

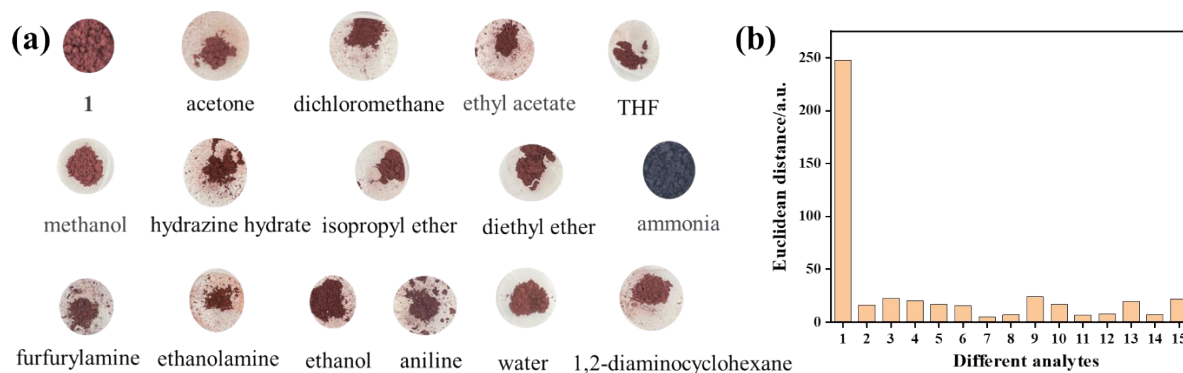

**Fig. S5** (a) Digital photographs and (b) corresponding Euclidean distances and of **1** after exposure to 15 analytes at full vapor pressure at room temperature. 1 =  $\text{NH}_3$ ; 2 = ethanol; 3 = hydrazine hydrate; 4 = methanol; 5 = 1,2-diaminocyclohexane; 6 = diethyl ether; 7 = isopropyl ether; 8 = tetrahydrofuran; 9 = ethanolamine; 10 = ethyl acetate; 11 = dichloromethane; 12 = acetone; 13 = furfurylamine; 14 = water; 15 = aniline.

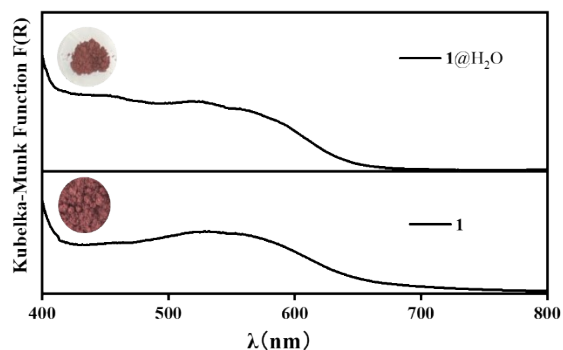

**Fig. S6** Diffuse reflectance spectrum of **1** and **1@H<sub>2</sub>O**.

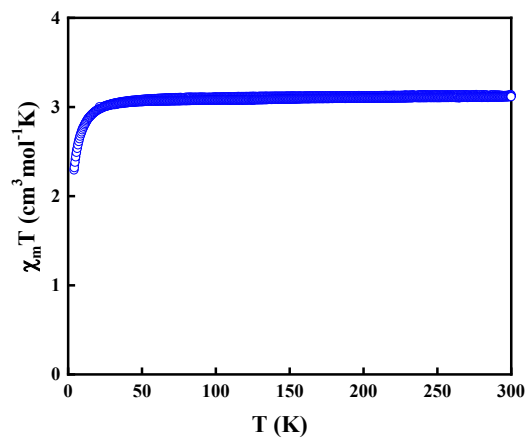

Fig. S7 Temperature-dependent  $\chi_m T$  vs  $T$  plots for **1**@NH<sub>3</sub>.

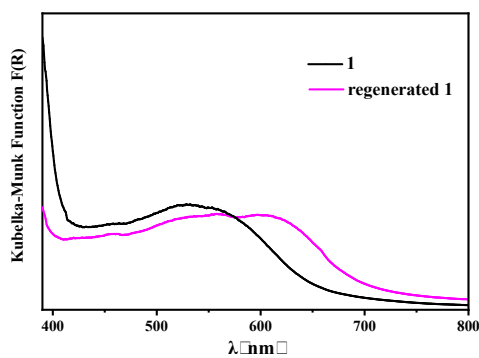

Fig. S8 Diffuse reflectance spectrum of regenerated **1**.

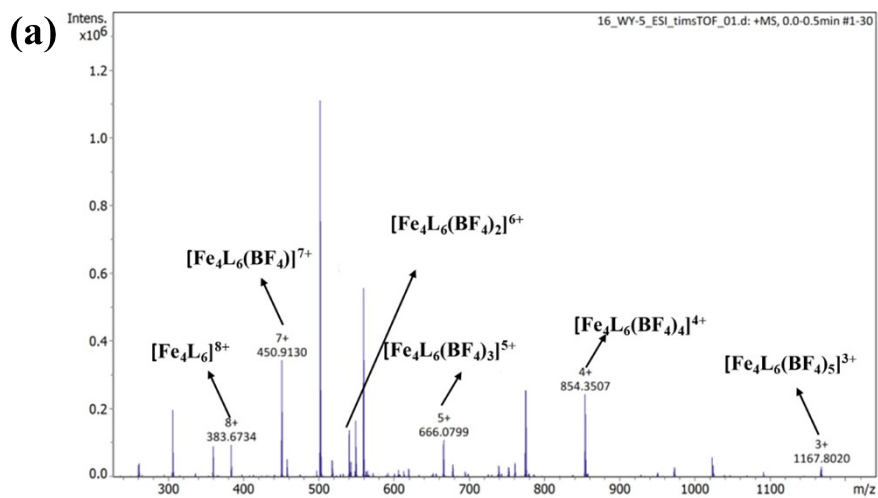

Fig. S9a ESI-TOF-MS spectrum of **2**.

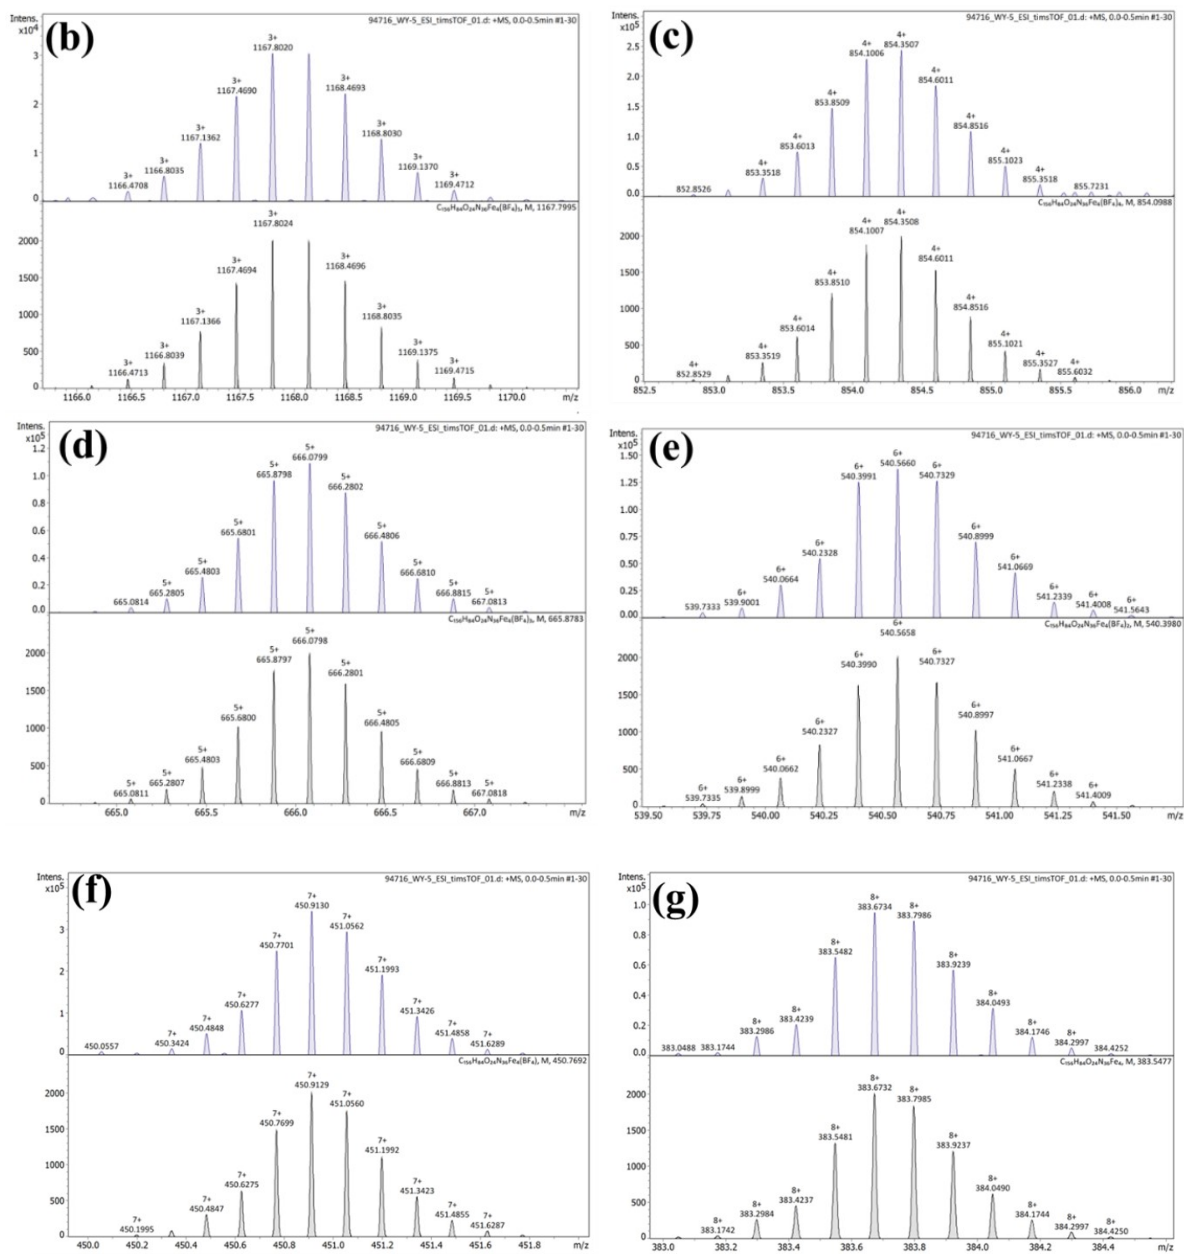

**Fig. S9b-S9g** Comparison of the observed isotopic patterns with the simulated spectra for different charge states from 3+ to 8+ of **2**.

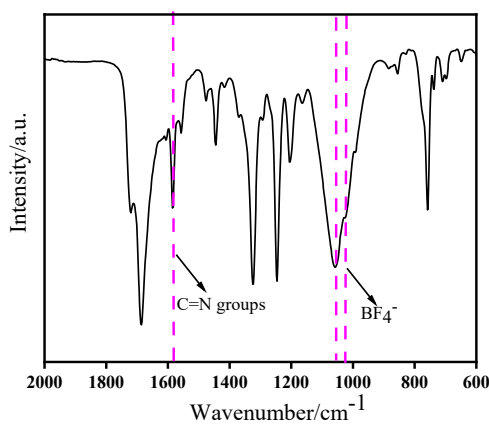

**Fig. S10** FT-IR for **2**.

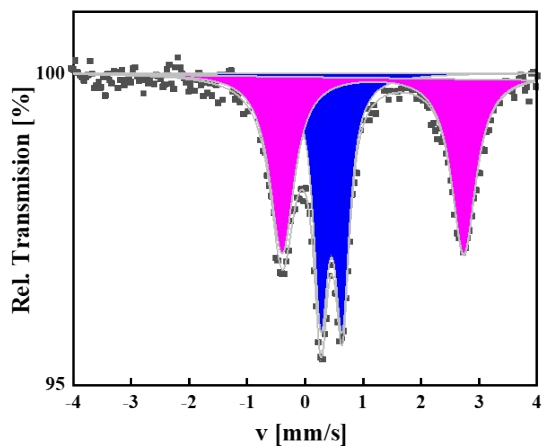

Fig. S11  $^{57}\text{Fe}$  Mössbauer spectrum of **2** recorded at 7 K.

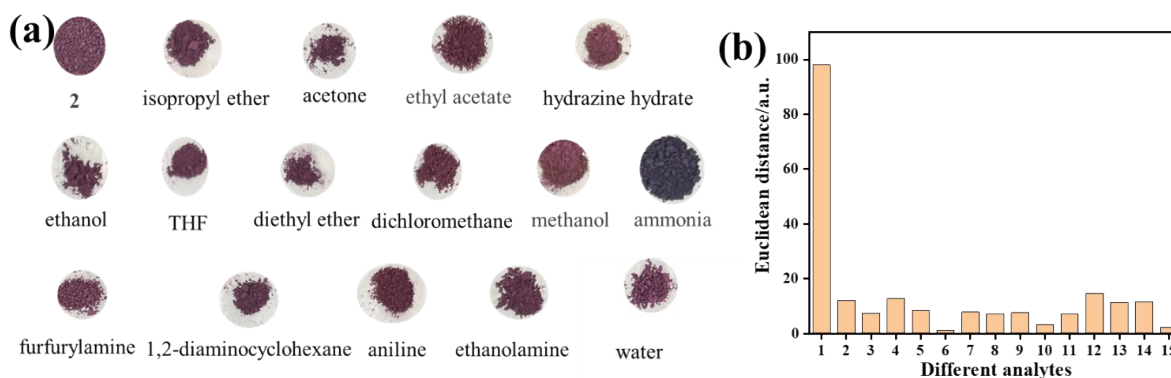

**Fig. S12** (a) Digital photographs and (b) corresponding Euclidean distances and of **2** after exposure to 15 analytes at full vapor pressure at room temperature. 1 =  $\text{NH}_3$ ; 2 = hydrazine hydrate; 3 = methanol; 4 = furfurylamine; 5 = ethanol; 6 = diethyl ether; 7 = acetone; 8 = isopropyl ether; 9 = tetrahydrofuran; 10 = dichloromethane; 11 = ethyl acetate; 12 = 1,2-diaminocyclohexane; 13 = aniline; 14 = ethanolamine; 15 = water.

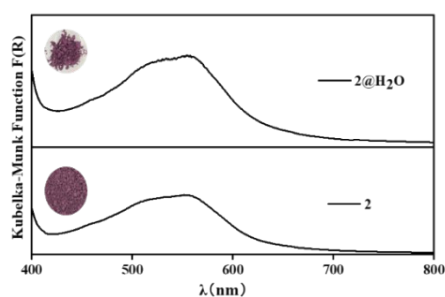

**Fig. S13** Diffuse reflectance spectrum and digital images of **2** and **2@H<sub>2</sub>O**.

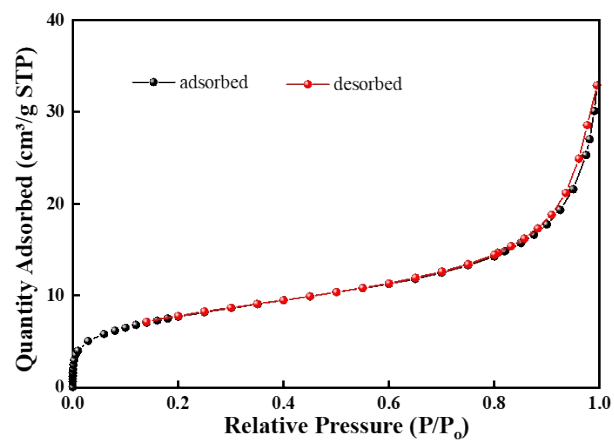

Fig. S14 Nitrogen adsorption-desorption isotherms of 2.

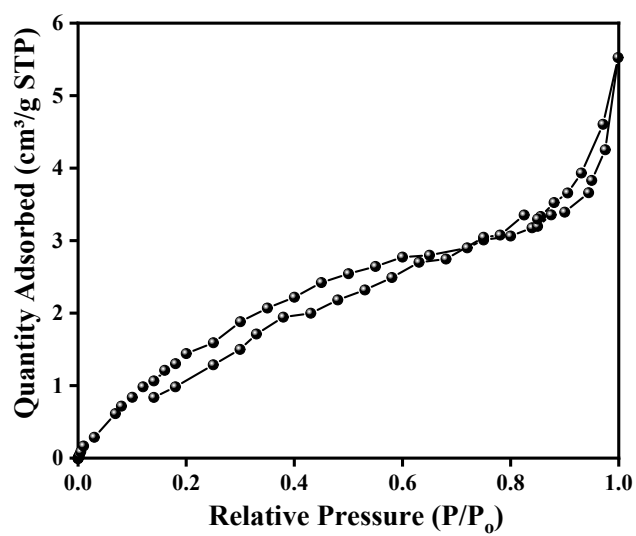

Fig. S15 Nitrogen adsorption-desorption isotherms of 1.

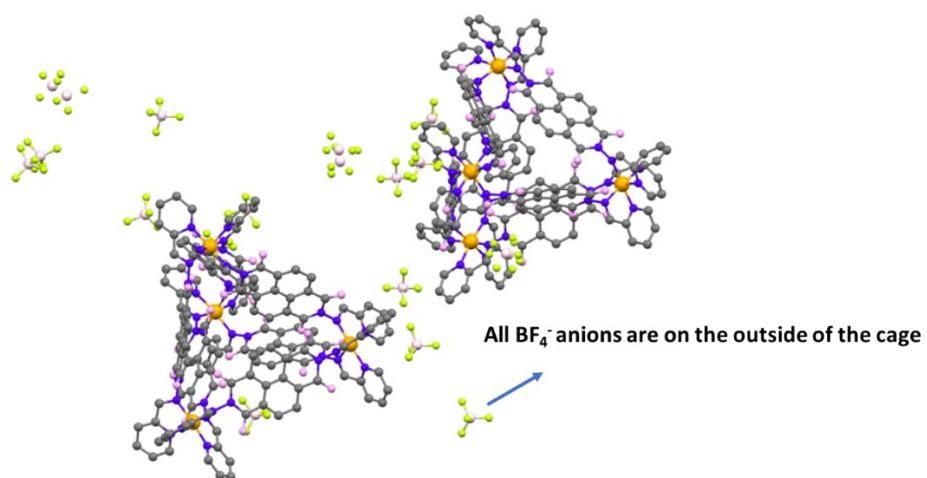

Fig. S16 Crystal structure of cage 2. No anions were found inside the cage cavity.

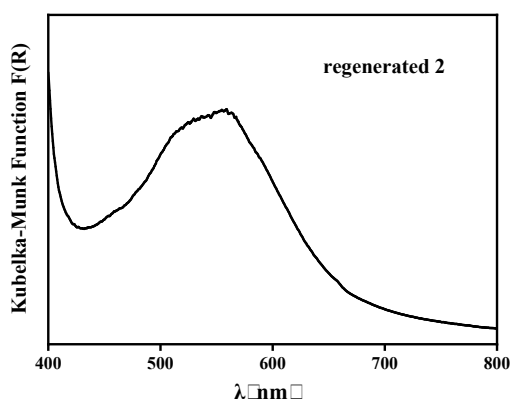

**Fig. S17** Diffuse reflectance spectrum of regenerated **2**.

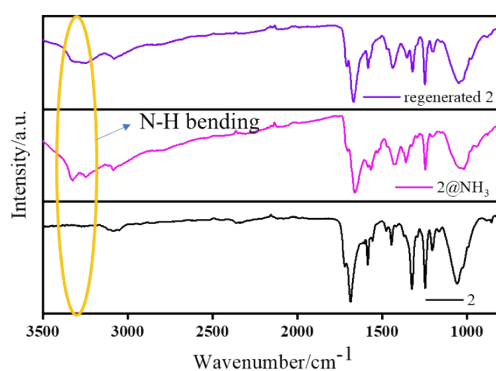

**Fig. S18** FT-IR spectral of **2@NH<sub>3</sub>** and regenerated **2**. The absorption bands located at 3000-3500  $\text{cm}^{-1}$  in **2@NH<sub>3</sub>** and regenerated **2** are characteristic of N-H bending,<sup>2</sup> indicating that **2** adsorbs ammonia molecules, while the structure is irreversible after regeneration, in agreement with the results observed by PXRD, diffuse reflectance spectra and <sup>57</sup>Fe Mössbauer spectra.

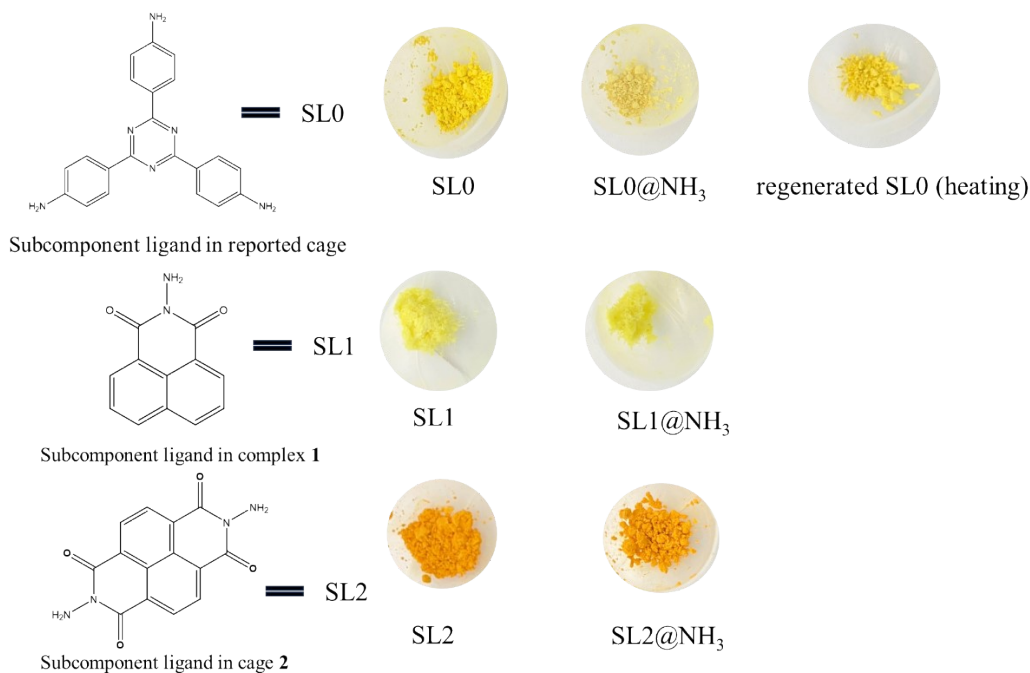

**Fig. S19** The subcomponent ligand structures of the reported cage (**SL0**), **1** (**SL1**) and **2** (**SL2**) and the corresponding colour changes after exposure to ammonia vapor.

**Table S3.** Response time database of **1** for ammonia.

| <b>1@NH<sub>3</sub></b> |              |          |          |          |          |          |           |
|-------------------------|--------------|----------|----------|----------|----------|----------|-----------|
| <b>Time (min)</b>       | <b>Times</b> | <b>R</b> | <b>G</b> | <b>B</b> | <b>H</b> | <b>S</b> | <b>B1</b> |
| 0                       | 1            | 107      | 63       | 58       | 6        | 45       | 41        |
|                         | 2            | 112      | 62       | 57       | 5        | 49       | 43        |
|                         | 3            | 108      | 63       | 58       | 5        | 46       | 42        |
| 1                       | 1            | 90       | 52       | 48       | 5        | 46       | 35        |
|                         | 2            | 89       | 50       | 47       | 4        | 47       | 34        |
|                         | 3            | 91       | 52       | 49       | 4        | 46       | 35        |
| 3                       | 1            | 100      | 71       | 68       | 5        | 31       | 39        |
|                         | 2            | 101      | 72       | 68       | 7        | 32       | 39        |
|                         | 3            | 96       | 69       | 65       | 7        | 32       | 37        |
| 5                       | 1            | 82       | 60       | 60       | 0        | 26       | 32        |
|                         | 2            | 76       | 55       | 55       | 0        | 27       | 29        |
|                         | 3            | 85       | 64       | 64       | 0        | 24       | 33        |
| 8                       | 1            | 55       | 54       | 63       | 246      | 14       | 24        |
|                         | 2            | 52       | 52       | 60       | 240      | 13       | 23        |
|                         | 3            | 57       | 56       | 65       | 246      | 13       | 25        |
| 10                      | 1            | 51       | 49       | 61       | 250      | 19       | 23        |
|                         | 2            | 50       | 48       | 60       | 250      | 19       | 23        |
|                         | 3            | 58       | 55       | 67       | 254      | 17       | 26        |
| 12                      | 1            | 53       | 52       | 61       | 246      | 14       | 23        |
|                         | 2            | 52       | 52       | 60       | 240      | 13       | 23        |
|                         | 3            | 51       | 50       | 59       | 246      | 15       | 23        |
| 15                      | 1            | 43       | 41       | 51       | 252      | 19       | 20        |
|                         | 2            | 48       | 46       | 57       | 250      | 19       | 22        |
|                         | 3            | 45       | 44       | 53       | 246      | 16       | 20        |

**Table S4.** Colour vectors for the response of **1** to different analytes.

| <b>Analytes</b>        | <b>Times</b> | <b>R</b> | <b>G</b> | <b>B</b> | <b>H</b> | <b>S</b> | <b>B1</b> |
|------------------------|--------------|----------|----------|----------|----------|----------|-----------|
| ammonia                | 1            | 107      | 63       | 58       | 6        | 45       | 41        |
|                        | 2            | 112      | 62       | 57       | 5        | 49       | 43        |
|                        | 3            | 108      | 63       | 58       | 5        | 46       | 42        |
| ethanol                | 1            | 95       | 53       | 51       | 2        | 46       | 37        |
|                        | 2            | 97       | 53       | 51       | 2        | 47       | 38        |
|                        | 3            | 100      | 57       | 54       | 3        | 46       | 39        |
| hydrazine hydrate      | 1            | 103      | 56       | 48       | 8        | 53       | 40        |
|                        | 2            | 98       | 51       | 44       | 7        | 55       | 38        |
|                        | 3            | 96       | 48       | 40       | 8        | 58       | 37        |
| methanol               | 1            | 97       | 55       | 52       | 3        | 46       | 38        |
|                        | 2            | 94       | 52       | 49       | 3        | 47       | 36        |
|                        | 3            | 92       | 51       | 49       | 2        | 46       | 36        |
| 1,2-diaminocyclohexane | 1            | 116      | 72       | 70       | 2        | 39       | 45        |
|                        | 2            | 115      | 70       | 70       | 0        | 39       | 45        |
|                        | 3            | 112      | 68       | 67       | 1        | 40       | 43        |
| diethyl ether          | 1            | 115      | 69       | 65       | 4        | 43       | 45        |
|                        | 2            | 118      | 72       | 68       | 4        | 42       | 46        |
|                        | 3            | 119      | 71       | 66       | 5        | 44       | 46        |
| isopropyl ether        | 1            | 109      | 63       | 60       | 3        | 44       | 42        |
|                        | 2            | 115      | 66       | 62       | 4        | 46       | 45        |
|                        | 3            | 110      | 64       | 60       | 4        | 45       | 43        |
| THF                    | 1            | 109      | 66       | 63       | 3        | 42       | 42        |
|                        | 2            | 103      | 60       | 57       | 3        | 44       | 40        |
|                        | 3            | 101      | 59       | 57       | 2        | 43       | 39        |
| ethanolamine           | 1            | 109      | 60       | 50       | 10       | 54       | 42        |
|                        | 2            | 93       | 49       | 40       | 10       | 56       | 36        |
|                        | 3            | 93       | 50       | 38       | 13       | 59       | 36        |



|                 |   |     |    |    |   |    |    |
|-----------------|---|-----|----|----|---|----|----|
| ethyl acetate   | 1 | 122 | 70 | 66 | 4 | 45 | 47 |
|                 | 2 | 123 | 71 | 67 | 4 | 45 | 48 |
|                 | 3 | 119 | 64 | 63 | 1 | 47 | 46 |
| dichloromethane | 1 | 109 | 64 | 62 | 2 | 43 | 42 |
|                 | 2 | 104 | 59 | 58 | 1 | 44 | 40 |
|                 | 3 | 106 | 61 | 60 | 1 | 43 | 41 |
| acetone         | 1 | 111 | 64 | 61 | 3 | 45 | 43 |
|                 | 2 | 120 | 72 | 69 | 3 | 42 | 47 |
|                 | 3 | 108 | 60 | 57 | 3 | 47 | 42 |
| furfurylamine   | 1 | 98  | 65 | 64 | 1 | 34 | 38 |
|                 | 2 | 100 | 66 | 66 | 0 | 33 | 39 |
|                 | 3 | 103 | 69 | 69 | 0 | 33 | 40 |
| water           | 1 | 105 | 61 | 58 | 3 | 44 | 41 |
|                 | 2 | 112 | 67 | 64 | 3 | 42 | 43 |
|                 | 3 | 93  | 54 | 51 | 4 | 45 | 36 |
| aniline         | 1 | 95  | 66 | 66 | 0 | 35 | 37 |
|                 | 2 | 93  | 65 | 64 | 0 | 33 | 36 |
|                 | 3 | 96  | 66 | 69 | 1 | 36 | 37 |

Table S5.  $^{57}\text{Fe}$  Mössbauer parameters of **1**, **1@NH<sub>3</sub>** and the regenerated **1**.

| Sample                  | Spin State          | A/A <sub>tot</sub><br>(%) | Mössbauer parameters           |                                    |            |
|-------------------------|---------------------|---------------------------|--------------------------------|------------------------------------|------------|
|                         |                     |                           | $\delta$ (mm s <sup>-1</sup> ) | $\Delta E_Q$ (mm s <sup>-1</sup> ) | $\Gamma/2$ |
| <b>1</b>                | Fe(II) HS (red)     | 100                       | 1.00 (1)                       | 2.56(2)                            | 0.14(1)    |
|                         | Fe(II) LS (blue)    | 33                        | 0.32(3)                        | 0.94(1)                            | 0.20(3)    |
| <b>1@NH<sub>3</sub></b> | Fe(II) HS (red)     | 41                        | 1.00 (1)                       | 2.61(2)                            | 0.12(1)    |
|                         | Fe(III) HS (yellow) | 26                        | 0.28(3)                        | 0.42(1)                            | 0.17 (1)   |
|                         | Fe(II) LS (blue)    | 24                        | 0.33(3)                        | 0.96(1)                            | 0.16(1)    |
| regenerated <b>1</b>    | Fe(II) HS (red)     | 45                        | 1.00(1)                        | 2.63(2)                            | 0.13(2)    |
|                         | Fe(III) HS (yellow) | 31                        | 0.29(3)                        | 0.47(1)                            | 0.18(1)    |

Table S6.  $^{57}\text{Fe}$  Mössbauer parameters of **2** recorded at 80 K and 7 K.

| Sample | Spin State       | A/A <sub>tot</sub><br>(%) | Mössbauer parameters           |                                    |            |
|--------|------------------|---------------------------|--------------------------------|------------------------------------|------------|
|        |                  |                           | $\delta$ (mm s <sup>-1</sup> ) | $\Delta E_Q$ (mm s <sup>-1</sup> ) | $\Gamma/2$ |
| 80 K   | Fe(II) LS (blue) | 46                        | 0.45                           | 0.36                               | 0.29       |
|        | Fe(II) HS (cyan) | 54                        | 1.16                           | 3.13                               | 0.51       |
| 7 K    | Fe(II) LS (blue) | 44                        | 0.45                           | 0.37                               | 0.30       |
|        | Fe(II) HS (cyan) | 56                        | 1.17                           | 3.13                               | 0.51       |

Table S7. Colour vectors for the response of **2** to other analytes.

| Analytes          | Times | R   | G  | B  | H   | S  | B1 |
|-------------------|-------|-----|----|----|-----|----|----|
| ammonia           | 1     | 56  | 56 | 61 | 240 | 8  | 23 |
|                   | 2     | 54  | 53 | 59 | 250 | 10 | 23 |
|                   | 3     | 55  | 55 | 61 | 240 | 9  | 23 |
| ethanol           | 1     | 90  | 47 | 70 | 327 | 47 | 35 |
|                   | 2     | 91  | 47 | 71 | 328 | 46 | 35 |
|                   | 3     | 93  | 50 | 73 | 327 | 46 | 36 |
| hydrazine hydrate | 1     | 84  | 47 | 64 | 332 | 44 | 32 |
|                   | 2     | 93  | 53 | 71 | 332 | 43 | 36 |
|                   | 3     | 85  | 47 | 67 | 328 | 44 | 33 |
| methanol          | 1     | 100 | 56 | 77 | 331 | 44 | 39 |
|                   | 2     | 105 | 59 | 82 | 329 | 43 | 41 |
|                   | 3     | 94  | 55 | 73 | 332 | 41 | 36 |

|                        |   |     |    |    |     |    |    |
|------------------------|---|-----|----|----|-----|----|----|
| 1,2-diaminocyclohexane | 1 | 102 | 60 | 80 | 324 | 41 | 40 |
|                        | 2 | 97  | 59 | 79 | 322 | 39 | 38 |
|                        | 3 | 95  | 58 | 82 | 321 | 38 | 37 |
| diethyl ether          | 1 | 92  | 50 | 69 | 332 | 45 | 36 |
|                        | 2 | 99  | 55 | 76 | 331 | 44 | 38 |
|                        | 3 | 100 | 53 | 77 | 329 | 47 | 39 |
| isopropyl ether        | 1 | 93  | 49 | 70 | 331 | 47 | 36 |
|                        | 2 | 89  | 46 | 67 | 330 | 48 | 34 |
|                        | 3 | 94  | 52 | 71 | 332 | 44 | 36 |
| THF                    | 1 | 93  | 53 | 73 | 329 | 43 | 36 |
|                        | 2 | 93  | 51 | 72 | 329 | 45 | 36 |
|                        | 3 | 86  | 47 | 66 | 330 | 45 | 33 |
| ethanolamine           | 1 | 99  | 54 | 77 | 329 | 45 | 38 |
|                        | 2 | 105 | 59 | 82 | 329 | 43 | 41 |
|                        | 3 | 106 | 59 | 82 | 330 | 44 | 41 |
| ethyl acetate          | 1 | 92  | 52 | 78 | 330 | 43 | 36 |
|                        | 2 | 100 | 55 | 81 | 325 | 45 | 39 |
|                        | 3 | 94  | 52 | 79 | 331 | 44 | 36 |
| dichloromethane        | 1 | 93  | 52 | 75 | 326 | 44 | 36 |
|                        | 2 | 97  | 54 | 79 | 325 | 44 | 38 |
|                        | 3 | 98  | 56 | 70 | 339 | 42 | 38 |
| acetone                | 1 | 98  | 56 | 78 | 328 | 42 | 38 |
|                        | 2 | 96  | 52 | 75 | 328 | 45 | 37 |
|                        | 3 | 103 | 61 | 81 | 331 | 40 | 40 |
| furfurylamine          | 1 | 94  | 57 | 79 | 324 | 39 | 36 |
|                        | 2 | 96  | 59 | 78 | 325 | 40 | 41 |
|                        | 3 | 90  | 56 | 77 | 322 | 37 | 35 |
| water                  | 1 | 98  | 51 | 73 | 331 | 47 | 38 |
|                        | 2 | 94  | 49 | 70 | 331 | 47 | 36 |
|                        | 3 | 97  | 52 | 73 | 331 | 46 | 38 |
| aniline                | 1 | 93  | 53 | 66 | 340 | 43 | 36 |
|                        | 2 | 97  | 56 | 69 | 340 | 42 | 38 |
|                        | 3 | 91  | 50 | 64 | 339 | 45 | 35 |

**Table S8.** Response time database of **2** for ammonia.

| <b>2@NH<sub>3</sub></b> |              |          |          |          |          |          |           |
|-------------------------|--------------|----------|----------|----------|----------|----------|-----------|
| <b>Time (s)</b>         | <b>Times</b> | <b>R</b> | <b>G</b> | <b>B</b> | <b>H</b> | <b>S</b> | <b>B1</b> |
| 0                       | 1            | 96       | 52       | 72       | 332      | 45       | 37        |
|                         | 2            | 94       | 50       | 71       | 331      | 46       | 36        |
|                         | 3            | 100      | 55       | 76       | 331      | 45       | 39        |
| 60                      | 1            | 70       | 48       | 67       | 308      | 31       | 27        |
|                         | 2            | 72       | 51       | 69       | 308      | 29       | 28        |
|                         | 3            | 73       | 52       | 70       | 308      | 28       | 28        |
| 90                      | 1            | 53       | 49       | 56       | 274      | 12       | 21        |
|                         | 2            | 50       | 46       | 54       | 270      | 14       | 21        |
|                         | 3            | 53       | 49       | 56       | 274      | 12       | 21        |
| 180                     | 1            | 56       | 56       | 61       | 240      | 8        | 23        |
|                         | 2            | 54       | 53       | 59       | 250      | 10       | 23        |
|                         | 3            | 55       | 55       | 61       | 240      | 9        | 23        |
| 300                     | 1            | 55       | 53       | 60       | 257      | 11       | 23        |
|                         | 2            | 56       | 55       | 62       | 248      | 11       | 24        |
|                         | 3            | 52       | 52       | 58       | 250      | 10       | 22        |
| 360                     | 1            | 47       | 46       | 52       | 250      | 11       | 20        |
|                         | 2            | 56       | 55       | 61       | 250      | 9        | 23        |
|                         | 3            | 55       | 54       | 61       | 248      | 11       | 23        |
| 480                     | 1            | 49       | 47       | 59       | 250      | 20       | 23        |
|                         | 2            | 51       | 48       | 60       | 255      | 19       | 23        |
|                         | 3            | 50       | 47       | 59       | 255      | 20       | 23        |

Table S9.  $^{57}\text{Fe}$  Mössbauer parameters of **2**, **2@NH<sub>3</sub>** and the regenerated **2**.

| Sample                  | Spin State           | $A/A_{\text{tot}}$<br>(%) | Mössbauer parameters            |                                     |            |
|-------------------------|----------------------|---------------------------|---------------------------------|-------------------------------------|------------|
|                         |                      |                           | $\delta$ ( $\text{mm s}^{-1}$ ) | $\Delta E_Q$ ( $\text{mm s}^{-1}$ ) | $\Gamma/2$ |
| <b>2</b>                | Fe(II) HS-1 (red)    | 24                        | 0.95                            | 2.00                                | 0.75       |
|                         | Fe(II) HS-2 (violet) | 17                        | 1.07                            | 2.74                                | 0.41       |
|                         | Fe(II) LS (blue)     | 59                        | 0.37                            | 0.30                                | 0.34       |
| <b>2@NH<sub>3</sub></b> | Fe(II) LS (blue)     | 21                        | 0.38(2)                         | 0.27(3)                             | 0.12(4)    |
|                         | Fe(II) LS-1 (cyan)   | 79                        | 0.32(2)                         | 0.62(1)                             | 0.32(1)    |
| regenerated <b>2</b>    | Fe(II) LS (blue)     | 25                        | 0.35(1)                         | 0.27(3)                             | 0.12(4)    |
|                         | Fe(II) LS-1 (cyan)   | 75                        | 0.32(2)                         | 0.65(1)                             | 0.28(3)    |

## References

1. Y. Cui, J. Du, Y. Liu, Y. Yu, S. Wang, H. Pang, Z. Liang and J. Yu, *Polym. Chem.*, 2018, **9**, 2643-2649.
2. X. Chen, Y. Yu, C. Yang, J. Yin, X. Song, J. Li and H. Fei, *ACS Appl. Mater. Interfaces*, 2021, **13**, 52765–52774.
